# Supplementary material
Source: publisher figshare collection journal article supplement (https://gsajournals.figshare.com/ndownloader/files/14597291)
Supplement: Supplementary file 1 [file 14597291]

## Sheet: upregulated in sas-4
Symbol	logFC	logCPM	PValue	FDR	sas4_rep1	sas4_rep2	sas4_rep3	yw_rep1	yw_rep2	yw_rep3	Avg sas4	Avg yw
Hsc70-2	-7.54014	6.17906	9.0821990262576e-314	0	2305	2452	2279	13	11	14	2345.33	12.6667
CG31157	-7.70883	5.11972	1.11289e-238	7.65057e-235	1077	1132	1167	7	3	6	1125.33	5.33333
Cyp6a17	-6.62753	4.9395	3.43017e-188	6.73734e-185	898	1045	1018	11	7	12	987	10
miple	-4.30685	6.01188	5.08386e-169	8.73724e-166	1906	1897	2203	118	91	98	2002	102.333
Gr64c	-6.23676	4.50579	9.52326e-164	1.45484e-160	698	732	754	8	10	11	728	9.66667
Gr64b	-6.23676	4.50579	1.12283e-163	1.54378e-160	698	732	754	8	10	11	728	9.66667
Gr64a	-9.11477	4.24748	8.99108e-152	1.1238e-148	539	624	683	0	1	2	615.333	1
l(2)03659	-5.14563	4.6939	2.30448e-141	2.64036e-138	783	786	886	16	32	22	818.333	23.3333
CG34002	-6.03725	3.71505	1.19269e-120	1.17131e-117	413	383	461	5	5	9	419	6.33333
CG17124	-4.16121	5.50543	4.54514e-118	4.16607e-115	1340	1316	1549	110	70	59	1401.67	79.6667
Gr64e	-6.80802	4.03986	1.61098e-105	1.3029e-102	423	603	558	6	4	4	528	4.66667
CG6330	-4.06474	4.63885	4.94175e-105	3.77467e-102	792	772	726	61	42	36	763.333	46.3333
Gr64d	-8.4221	3.05756	1.3791e-104	9.97961e-102	248	257	298	0	2	0	267.667	0.666667
AcCoAS	-3.03755	5.09611	3.09357e-95	2.12667e-92	1047	971	956	125	137	106	991.333	122.667
CG11594	-3.49446	4.70498	3.89224e-94	2.5483e-91	864	731	740	69	77	64	778.333	70
Ilp8	-6.26572	4.26649	2.24438e-90	1.40264e-87	544	787	512	6	9	9	614.333	8
CG12224	-6.2888	2.92042	4.35516e-84	2.49496e-81	258	248	215	1	5	3	240.333	3
CG7966	-3.40275	4.67969	1.10937e-83	6.10108e-81	719	688	878	70	73	75	761.667	72.6667
CG44085	-2.79385	5.02971	5.73775e-83	3.03417e-80	930	911	944	157	135	116	928.333	136
Ets21C	-4.6179	3.19938	1.23733e-82	6.30076e-80	306	277	271	12	14	9	284.667	11.6667
CG32364	-3.97893	4.25098	2.53733e-74	1.24592e-71	529	568	646	38	27	46	581	37
CG4267	-5.43775	2.88844	7.02316e-74	3.3297e-71	207	224	268	9	3	4	233	5.33333
Ddc	-4.46754	3.21728	1.16858e-71	5.35559e-69	304	297	259	12	10	17	286.667	13
CG42260	-5.87874	3.22681	7.05753e-71	3.13013e-68	361	295	234	6	4	5	296.667	5
CG43144	-3.39923	3.68557	1.82623e-69	7.60873e-67	385	381	374	36	32	41	380	36.3333
Mmp1	-2.29634	7.33654	4.21636e-69	1.70502e-66	4614	4289	4225	1091	889	744	4376	908
Gr64f	-5.00269	3.6027	1.35681e-64	5.32993e-62	281	428	434	17	12	7	381	12
del	-2.02482	6.27425	7.06038e-63	2.69648e-60	2020	1851	2207	537	525	453	2026	505
CG42708	-4.36593	2.92183	2.25284e-61	8.37144e-59	274	201	223	11	13	10	232.667	11.3333
Cyp6a23	-6.43555	1.98524	8.8401e-61	3.19849e-58	119	118	136	3	0	1	124.333	1.33333
CG15784	-2.09269	6.23073	4.26856e-60	1.50483e-57	1914	2114	1909	464	483	463	1979	470
SoYb	-2.81406	5.1901	8.98008e-60	3.08668e-57	1193	884	1045	182	125	142	1040.67	149.667
rpk	-2.45722	4.99715	5.81488e-57	1.94997e-54	918	744	978	183	169	136	880	162.667
wun2	-2.46953	5.14118	6.70874e-56	2.14508e-53	1006	828	1088	215	176	145	974	178.667
ImpL2	-2.21032	5.58283	8.03301e-56	2.45435e-53	1288	1256	1305	333	303	213	1283	283
scaf	-1.79712	6.99729	1.50385e-55	4.49489e-53	3141	3155	3406	931	993	903	3234	942.333
CG4822	-4.75902	2.8047	3.79377e-53	1.0645e-50	188	244	217	15	2	7	216.333	8
CG15279	-2.47907	4.85915	3.7229e-53	1.0645e-50	712	870	815	133	164	139	799	145.333
cac	-2.71481	4.3852	1.38778e-51	3.66935e-49	639	521	607	106	77	89	589	90.6667
CG5282	-6.44479	1.62967	2.15676e-51	5.59495e-49	91	102	96	1	2	0	96.3333	1
CG33107	-2.43634	5.41868	5.56993e-49	1.39238e-46	1071	1181	1272	185	223	247	1174.67	218.333
Ugt86Di	-1.79372	6.36382	4.10047e-48	1.00674e-45	2075	1879	2301	671	632	529	2085	610.667
upd2	-4.44135	2.32106	5.978e-47	1.44196e-44	169	163	125	6	7	8	152.333	7
Tret1-1	-3.36314	3.51722	3.15181e-46	7.34479e-44	391	263	360	34	43	23	338	33.3333
CG3523	-2.03174	7.81256	4.22049e-43	9.51271e-41	7060	5154	5460	1371	1481	1507	5891.33	1453
CG4174	-6.10119	1.30569	5.33186e-43	1.18238e-40	76	75	77	0	2	1	76	1
CG14985	-2.32122	4.41847	7.81959e-43	1.70653e-40	540	536	661	136	109	107	579	117.333
Rcd2	-2.49418	3.88891	5.62564e-42	1.18995e-39	397	404	421	63	78	78	407.333	73
moody	-2.25575	4.58617	4.17303e-39	8.56343e-37	669	613	653	158	110	141	645	136.333
CG31370	-2.5432	3.36826	1.21125e-37	2.41356e-35	248	280	326	46	52	50	284.667	49.3333
CG15661	-3.65107	2.13555	2.34241e-37	4.60083e-35	116	116	157	8	12	11	129.667	10.3333
St3	-3.09673	3.02154	7.79574e-37	1.50963e-34	193	253	256	20	37	26	234	27.6667
GstD1	-1.3633	10.1174	2.13122e-36	4.06974e-34	26555	26642	25001	11140	10929	8884	26066	10317.7
CG42364	-9.08012	1.11537	2.29454e-36	4.32159e-34	49	74	78	0	0	0	67	0
CG13380	-4.37942	1.38087	3.36027e-36	6.24329e-34	80	75	78	4	3	4	77.6667	3.66667
Pvf2	-1.87862	5.30463	1.88598e-32	3.36758e-30	1061	857	1120	353	261	226	1012.67	280
GstD3	-1.74782	7.14228	4.93486e-32	8.69865e-30	2751	3845	4045	1072	1124	1015	3547	1070.33
lig3	-1.54199	5.50948	6.77491e-32	1.17909e-29	1103	993	1218	395	386	370	1104.67	383.667
Pvf1	-2.27114	3.19773	4.67729e-31	8.03851e-29	254	218	264	63	55	37	245.333	51.6667
w	-6.27872	1.47123	3.41984e-30	5.80487e-28	947	779	790	819	488	559	838.667	622
CG15673	-4.02769	1.17357	7.51319e-30	1.22975e-27	62	65	71	5	6	1	66	4
CG42363	-2.70648	2.61935	7.39973e-30	1.22975e-27	150	180	182	30	19	30	170.667	26.3333
CG42362	-2.70648	2.61935	7.49765e-30	1.22975e-27	150	180	182	30	19	30	170.667	26.3333
NLaz	-4.99224	0.910527	1.22042e-29	1.97406e-27	50	55	63	3	2	0	56	1.66667
insc	-2.14774	4.38318	2.27627e-29	3.63913e-27	633	520	504	158	104	117	552.333	126.333
Tdc1	-2.95096	3.18154	3.54747e-29	5.60623e-27	315	255	206	24	37	40	258.667	33.6667
CG9192	-3.06429	2.86227	5.54287e-29	8.56281e-27	173	174	281	26	32	18	209.333	25.3333
CG7900	-1.98569	4.11547	5.50781e-29	8.56281e-27	445	395	508	139	116	91	449.333	115.333
CG10527	-1.89443	6.82419	1.33464e-28	2.01647e-26	2531	3652	2514	695	895	785	2899	791.667
puc	-1.36706	6.01258	1.90417e-28	2.84569e-26	1653	1420	1472	612	615	559	1515	595.333
Dif	-1.97168	3.69238	2.30633e-28	3.40964e-26	308	343	348	81	82	94	333	85.6667
CG11880	-1.6246	4.88576	8.62211e-28	1.26112e-25	749	650	780	285	232	201	726.333	239.333
Muc68Ca	-2.29656	4.14407	1.70745e-27	2.44539e-25	467	536	423	122	75	97	475.333	98
CG7432	-1.71971	4.39575	1.80056e-27	2.55216e-25	518	560	492	154	180	150	523.333	161.333
SK	-4.75345	1.12708	1.67601e-26	2.35137e-24	83	45	68	2	3	2	65.3333	2.33333
CG9961	-3.88207	1.04498	3.0831e-26	4.28177e-24	55	63	61	4	6	2	59.6667	4
Appl	-2.11101	2.94336	6.9441e-26	9.45291e-24	188	216	198	41	52	48	200.667	47
CG3168	-1.79902	6.09279	2.22748e-25	2.97336e-23	2033	1448	1705	656	507	361	1728.67	508
CG34057	-2.5432	2.51616	3.07926e-25	4.07085e-23	161	153	155	39	29	14	156.333	27.3333
tal-AA	-1.62367	3.76149	8.37287e-25	1.08606e-22	329	346	318	113	113	101	331	109
tal-3A	-1.62367	3.76149	8.49775e-25	1.08606e-22	329	346	318	113	113	101	331	109
tal-2A	-1.62367	3.76149	8.53058e-25	1.08606e-22	329	346	318	113	113	101	331	109
tal-1A	-1.62367	3.76149	8.53115e-25	1.08606e-22	329	346	318	113	113	101	331	109
CG7997	-2.39854	2.36006	8.84174e-25	1.11528e-22	128	146	139	30	20	29	137.667	26.3333
scb	-1.87934	6.84341	9.88813e-25	1.23593e-22	3297	2329	3222	1125	721	607	2949.33	817.667
CG18641	-3.1934	1.53534	1.4394e-24	1.78291e-22	76	86	84	16	4	7	82	9
CG5022	-4.072	1.22475	1.80682e-24	2.21804e-22	59	55	92	3	3	6	68.6667	4
CG13117	-2.29337	3.39975	2.35627e-24	2.81708e-22	302	305	241	78	61	38	282.667	59
Tg	-2.12851	2.65607	2.43269e-24	2.88336e-22	154	172	167	32	43	39	164.333	38
Clect27	-1.54407	5.89581	2.68848e-24	3.1593e-22	1414	1554	1356	417	562	520	1441.33	499.667
CG14907	-1.90918	3.47966	4.46794e-24	5.20591e-22	241	286	327	75	80	75	284.667	76.6667
CG30345	-3.84305	1.7045	4.9215e-24	5.6862e-22	90	66	133	10	4	6	96.3333	6.66667
CG3253	-1.9614	3.35151	8.87697e-24	1.01708e-21	220	278	288	66	68	70	262	68
CG10126	-1.71703	4.03884	9.49271e-24	1.0698e-21	438	374	414	145	139	96	408.667	126.667
Tep2	-1.15143	6.82551	1.73429e-23	1.90758e-21	2422	2522	2703	1326	1156	1017	2549	1166.33
tipE	-3.62812	1.11502	2.21985e-23	2.42228e-21	55	74	57	8	5	2	62	5
nAcRbeta-21C	-4.83135	0.764053	3.39577e-23	3.64753e-21	61	52	37	0	4	1	50	1.66667
CG3588	-8.06117	0.17341	4.91373e-23	5.23712e-21	26	36	37	0	0	0	33	0
sda	-1.23798	8.44771	5.67603e-23	6.00306e-21	7679	8191	8103	3213	3517	3531	7991	3420.33
CG32017	-2.89965	1.4783	1.143e-22	1.19054e-20	69	72	90	11	8	12	77	10.3333
CG14567	-1.88273	3.2427	1.18406e-22	1.22403e-20	225	228	268	82	69	48	240.333	66.3333
CG1572	-1.44911	6.76527	1.23277e-22	1.26488e-20	2207	2797	2774	810	1139	937	2592.67	962
gd	-3.05433	1.19947	3.44811e-22	3.5117e-20	64	58	69	6	10	7	63.6667	7.66667
Edg78E	-4.07228	0.971865	6.46491e-22	6.53574e-20	73	51	47	7	2	1	57	3.33333
vir-1	-1.19464	6.21003	6.75893e-22	6.78311e-20	1774	1464	1803	823	772	642	1680.33	745.667
CG43103	-4.36201	0.942315	7.84324e-22	7.81425e-20	38	66	65	1	5	2	56.3333	2.66667
CG3036	-1.78643	5.14118	8.98847e-22	8.89082e-20	1024	714	936	352	232	205	891.333	263
CG15546	-1.4208	5.02481	1.06051e-21	1.0415e-19	871	709	732	344	293	242	770.667	293
wun	-1.12595	6.09165	1.92756e-21	1.8543e-19	1535	1430	1607	744	777	609	1524	710
unc79	-1.65685	4.0659	3.49356e-21	3.31261e-19	457	411	367	122	147	128	411.667	132.333
CG17341	-8.58081	0.646795	4.3395e-21	4.05876e-19	23	59	60	0	0	0	47.3333	0
CG11656	-2.26568	2.65857	4.6748e-21	4.34283e-19	199	144	160	48	29	29	167.667	35.3333
CG5835	-1.60239	4.04598	6.10425e-21	5.59515e-19	452	376	380	153	143	109	402.667	135
CG13618	-4.47114	0.444191	7.04565e-21	6.41527e-19	38	35	44	5	0	0	39	1.66667
ImpL3	-2.42068	4.52001	1.38426e-20	1.24393e-18	607	629	647	190	107	65	627.667	120.667
Scgdelta	-1.23458	5.45582	3.68079e-20	3.26498e-18	1025	901	1084	501	441	359	1003.33	433.667
Socs36E	-1.01981	6.72109	3.67684e-20	3.26498e-18	2390	2217	2299	1126	1200	1121	2302	1149
CG1299	-1.21936	5.07485	4.33531e-20	3.82091e-18	759	807	731	333	353	315	765.667	333.667
fu12	-4.85119	0.51002	7.0472e-20	6.17146e-18	50	46	28	2	0	2	41.3333	1.33333
MtnA	-2.04227	2.36474	8.9738e-20	7.7598e-18	143	127	127	42	34	22	132.333	32.6667
yellow-b	-1.20817	5.40119	1.17339e-19	1.0083e-17	901	977	1000	410	490	367	959.333	422.333
CG13397	-1.56086	3.25732	1.37872e-19	1.17013e-17	244	210	237	81	79	77	230.333	79
CG14879	-2.31641	3.11299	1.74039e-19	1.46801e-17	162	238	297	46	57	39	232.333	47.3333
CG44098	-4.21449	0.813223	1.75273e-19	1.46941e-17	69	35	49	5	1	2	51	2.66667
mRpL37	-1.01643	6.47798	6.36071e-19	5.23673e-17	1856	1956	2017	1024	1052	854	1943	976.667
Arc1	-1.34037	4.9229	7.96394e-19	6.47907e-17	689	671	762	307	339	210	707.333	285.333
CG10570	-1.68127	3.8277	8.11899e-19	6.49e-17	313	365	373	134	124	77	350.333	111.667
CG42502	-1.68127	3.8277	8.03907e-19	6.49e-17	313	365	373	134	124	77	350.333	111.667
CG7367	-1.76676	3.52942	8.49726e-19	6.75311e-17	308	256	302	107	97	56	288.667	86.6667
Arpc3B	-3.80747	0.455047	1.04506e-18	8.2578e-17	34	38	43	3	4	1	38.3333	2.66667
CRMP	-1.30744	4.72293	1.16752e-18	9.17274e-17	622	564	648	285	227	238	611.333	250
CG14397	-3.81003	0.608996	1.30135e-18	1.0166e-16	34	53	42	2	4	3	43	3
cv-2	-1.1183	6.65479	1.93051e-18	1.49958e-16	2661	1970	2115	1100	1077	973	2248.67	1050
Ada	-1.6383	3.25749	3.61443e-18	2.74557e-16	213	240	247	93	66	69	233.333	76
CG3397	-5.86804	-0.0979564	5.41281e-18	4.08905e-16	29	23	27	0	0	1	26.3333	0.333333
CG31955	-2.15468	2.42318	5.92293e-18	4.44997e-16	110	142	168	27	33	35	140	31.6667
Drep-2	-2.28356	1.54031	6.76028e-18	5.05148e-16	72	78	77	13	18	16	75.6667	15.6667
CG42666	-1.6031	4.13734	6.93479e-18	5.15386e-16	501	384	403	177	143	112	429.333	144
CG7433	-2.15128	1.85397	8.43646e-18	6.23617e-16	101	89	90	23	28	13	93.3333	21.3333
Cyp18a1	-3.35533	2.57027	1.44189e-17	1.0545e-15	208	158	154	35	11	6	173.333	17.3333
UK114	-2.76377	1.17609	1.6147e-17	1.17463e-15	63	69	51	9	7	11	61	9
CG14741	-1.85866	4.39945	1.97658e-17	1.43031e-15	660	374	581	173	130	146	538.333	149.667
Caps	-2.12343	3.00388	7.68736e-17	5.47634e-15	165	190	276	38	59	49	210.333	48.6667
PGRP-SA	-2.2388	1.6485	1.00294e-16	7.10795e-15	70	88	86	15	16	21	81.3333	17.3333
CG18233	-5.04552	-0.11364	1.46524e-16	1.01745e-14	27	25	25	0	1	1	25.6667	0.666667
CG3788	-1.31234	5.05153	2.31415e-16	1.59885e-14	760	884	656	364	300	279	766.667	314.333
plx	-1.3879	4.95432	2.42469e-16	1.66685e-14	761	763	660	275	247	318	728	280
CG43338	-3.48832	0.599099	2.73699e-16	1.87219e-14	53	35	38	5	0	6	42	3.66667
phr6-4	-1.32362	4.19529	5.37654e-16	3.60595e-14	379	434	460	162	186	167	424.333	171.667
Damm	-2.63757	1.07418	5.58948e-16	3.73057e-14	51	58	59	4	11	12	56	9
Cul-2	-0.90108	7.87331	8.28528e-16	5.47665e-14	4807	4928	5201	2749	2764	2586	4978.67	2699.67
nAcRalpha-96Aa	-3.92617	0.198547	9.17784e-16	6.00886e-14	40	28	27	3	2	1	31.6667	2
CG6071	-1.50986	2.80744	1.00737e-15	6.56414e-14	155	168	176	62	67	49	166.333	59.3333
CG7054	-1.0731	5.56948	1.15283e-15	7.47651e-14	947	1060	1136	526	587	410	1047.67	507.667
CG1146	-1.05316	6.37065	1.20922e-15	7.80545e-14	2013	1743	1699	1047	903	730	1818.33	893.333
CG5953	-1.48569	3.59918	1.73626e-15	1.11032e-13	287	251	329	89	112	111	289	104
CG14207	-0.916066	6.88878	1.84254e-15	1.17283e-13	2548	2643	2372	1471	1362	1239	2521	1357.33
Cpr64Ac	-6.50505	2.05627	1.85938e-15	1.17809e-13	27	225	139	1	1	2	130.333	1.33333
SerT	-2.37907	2.55953	1.89898e-15	1.19766e-13	224	128	123	37	35	21	158.333	31
CG18304	-3.66771	0.173722	1.99824e-15	1.25451e-13	31	33	28	2	2	3	30.6667	2.33333
GNBP2	-1.25971	4.46248	2.23824e-15	1.39247e-13	459	514	541	192	247	202	504.667	213.667
p38c	-2.21843	1.39696	2.6592e-15	1.64691e-13	58	75	70	14	16	14	67.6667	14.6667
Wwox	-1.14656	4.8459	9.64591e-15	5.81674e-13	572	675	683	283	305	294	643.333	294
fs(1)Yb	-2.87906	0.568212	1.16786e-14	6.98125e-13	42	40	36	5	8	3	39.3333	5.33333
CG18234	-4.3273	0.0515883	1.68313e-14	9.97474e-13	37	30	19	2	1	1	28.6667	1.33333
mtg	-1.02893	5.74942	1.99085e-14	1.17477e-12	1312	1128	1084	680	573	504	1174.67	585.667
CG13029	-2.28671	1.18087	2.90829e-14	1.69433e-12	50	58	67	11	11	14	58.3333	12
CG13937	-3.8782	0.34621	2.92373e-14	1.69614e-12	29	50	27	1	4	2	35.3333	2.33333
CG6026	-1.60861	3.84529	3.2126e-14	1.85588e-12	358	340	353	87	121	138	350.333	115.333
CG11073	-1.71201	3.96589	4.19564e-14	2.3936e-12	406	405	351	157	138	70	387.333	121.667
Men	-1.24356	4.60902	4.25903e-14	2.41972e-12	583	568	519	300	234	186	556.667	240
dpr19	-1.94803	2.82594	5.37011e-14	3.03842e-12	180	165	198	72	46	26	181	48
CG1890	-0.874991	6.75517	9.41287e-14	5.28235e-12	2087	2440	2300	1364	1365	1065	2275.67	1264.67
GstE6	-2.21644	2.40622	1.104e-13	6.1453e-12	85	161	172	32	31	28	139.333	30.3333
CG10337	-1.23669	4.40893	1.75262e-13	9.71642e-12	451	459	543	180	252	193	484.333	208.333
CG5080	-2.48812	1.08552	1.92687e-13	1.06396e-11	65	49	53	18	6	6	55.6667	10
CG4998	-1.74406	2.44019	2.48256e-13	1.36531e-11	129	152	119	30	51	40	133.333	40.3333
CG7194	-1.85564	2.17764	3.84975e-13	2.1004e-11	92	129	117	28	28	38	112.667	31.3333
CG32640	-0.955434	7.25861	5.55444e-13	3.0185e-11	2890	3252	3744	1960	1887	1356	3295.33	1734.33
CG31098	-1.76988	2.63794	5.58814e-13	3.02486e-11	131	180	151	37	64	37	154	46
CG5096	-1.54999	2.48922	7.04488e-13	3.78359e-11	145	108	149	43	55	41	134	46.3333
GstE5	-1.91459	3.00818	7.79453e-13	4.16992e-11	163	211	240	83	44	39	204.667	55.3333
CG10339	-3.58781	-0.0836334	1.12207e-12	5.97959e-11	25	23	27	2	4	0	25	2
CG7787	-0.928779	4.99562	1.24304e-12	6.59867e-11	649	644	748	389	375	324	680.333	362.667
CG34423	-2.68994	0.498766	1.75593e-12	9.24993e-11	34	44	32	5	6	6	36.6667	5.66667
png	-2.34624	0.840007	1.87009e-12	9.81371e-11	44	51	42	10	6	11	45.6667	9
Spindly	-0.811342	6.59368	1.88592e-12	9.85911e-11	1978	1851	2190	1212	1188	1075	2006.33	1158.33
CG10257	-4.25197	-0.337451	1.9436e-12	1.01222e-10	19	18	26	2	1	0	21	1
Sk1	-1.57064	2.19058	2.02166e-12	1.0489e-10	127	97	102	39	36	36	108.667	37
CG3634	-0.825433	6.45701	2.1211e-12	1.09635e-10	1920	1826	1739	1149	1070	928	1828.33	1049
CG9411	-1.60307	4.49748	2.66146e-12	1.36539e-10	688	596	366	208	171	173	550	184
upd3	-1.91489	1.42567	3.19923e-12	1.62912e-10	66	64	69	17	13	23	66.3333	17.6667
CG42854	-3.39096	-0.0508823	3.22319e-12	1.63527e-10	25	27	24	2	1	4	25.3333	2.33333
gammaTub37C	-4.61777	-0.472246	6.20867e-12	3.0596e-10	15	23	19	0	2	0	19	0.666667
Jra	-0.792424	6.21793	6.2651e-12	3.07639e-10	1607	1452	1553	942	979	786	1537.33	902.333
CG15739	-2.09439	1.17496	6.89516e-12	3.37372e-10	46	62	62	10	14	16	56.6667	13.3333
Cyp9f2	-1.04875	3.76415	7.83364e-12	3.80582e-10	299	281	309	138	155	142	296.333	145
CG11155	-1.62894	2.80285	7.91816e-12	3.83334e-10	129	177	202	50	72	45	169.333	55.6667
CG31875	-1.61087	2.47552	1.08873e-11	5.25147e-10	161	113	128	55	35	43	134	44.3333
Spn55B	-0.961708	5.13763	1.32299e-11	6.33791e-10	824	755	688	464	385	336	755.667	395
CG11700	-0.915658	5.87717	1.33088e-11	6.35357e-10	1292	1167	1295	817	685	528	1251.33	676.667
CG13386	-5.21183	-0.644789	1.35656e-11	6.45374e-10	13	17	20	0	0	1	16.6667	0.333333
CG34325	-1.59012	3.24912	1.3856e-11	6.56916e-10	171	284	234	95	72	66	229.667	77.6667
CG18507	-1.11375	5.62615	1.4644e-11	6.91892e-10	1088	1246	956	428	559	549	1096.67	512
His1:CG31617	-1.23172	3.60252	1.48655e-11	6.99953e-10	230	311	284	121	119	116	275	118.667
Rpt3R	-1.2578	2.86681	1.52911e-11	7.17533e-10	164	148	184	78	67	65	165.333	70
ltd	-1.6933	2.57552	1.54008e-11	7.20221e-10	162	113	163	63	46	29	146	46
CG33491	-2.24486	4.01516	1.61206e-11	7.51328e-10	597	471	225	123	98	60	431	93.6667
CG13692	-1.58765	2.04211	1.79083e-11	8.31829e-10	80	108	106	31	36	32	98	33
CG6044	-1.10762	5.4951	2.03665e-11	9.42825e-10	1052	860	1100	614	472	342	1004	476
CG16984	-1.48558	2.37759	2.30388e-11	1.06295e-09	108	114	145	41	56	36	122.333	44.3333
His2B:CG17949	-1.16137	4.28922	2.33663e-11	1.07446e-09	377	488	448	223	181	191	437.667	198.333
CG32641	-0.902446	6.3085	2.67998e-11	1.22823e-09	1475	1665	1909	1039	998	719	1683	918.667
GS	-0.930476	8.06036	2.76746e-11	1.26411e-09	6390	6074	4622	3105	3172	2833	5695.33	3036.67
Gadd45	-1.07822	4.03481	3.30094e-11	1.49784e-09	381	316	385	178	170	170	360.667	172.667
Cyt-c-p	-0.828182	6.32468	5.77178e-11	2.59334e-09	1496	1776	1735	985	1091	799	1669	958.333
f	-1.404	3.53408	7.09664e-11	3.16791e-09	347	256	211	106	108	98	271.333	104
mtsh	-1.59978	2.05268	7.206e-11	3.20632e-09	89	100	108	23	42	34	99	33
synaptogyrin	-2.20846	0.682941	7.36858e-11	3.26808e-09	34	40	46	9	7	10	40	8.66667
CG5375	-1.63642	1.73475	7.47542e-11	3.30481e-09	76	78	84	24	21	32	79.3333	25.6667
Cyp6d4	-1.07544	4.33644	7.72075e-11	3.39146e-09	375	446	513	237	220	186	444.667	214.333
AnnX	-1.37657	4.80217	9.37184e-11	4.07764e-09	810	691	457	311	263	198	652.667	257.333
CG8563	-1.90748	1.12853	9.80304e-11	4.2518e-09	54	59	47	16	12	15	53.3333	14.3333
kcc	-0.928182	4.45771	1.08304e-10	4.6826e-09	444	449	510	270	253	225	467.667	249.333
LamC	-1.46125	6.53897	1.11603e-10	4.81012e-09	1795	2977	1864	589	933	912	2212	811.333
CG8451	-1.17342	3.94862	1.20217e-10	5.1652e-09	339	298	404	137	183	147	347	155.667
His2B:CG33908	-1.26352	2.9453	1.27538e-10	5.46266e-09	193	174	157	91	70	61	174.667	74
Cys	-1.51549	1.75894	1.51859e-10	6.44418e-09	71	87	79	31	28	25	79	28
CG13954	-1.81749	1.32209	1.97821e-10	8.31756e-09	52	60	70	12	21	19	60.6667	17.3333
CG43333	-1.0633	4.271	2.05935e-10	8.60608e-09	467	383	421	251	200	168	423.667	206.333
CG33469	-3.76298	-0.412901	2.57192e-10	1.0651e-08	14	23	21	3	1	0	19.3333	1.33333
Rbp4	-1.59686	2.01466	2.72193e-10	1.12384e-08	122	81	86	37	35	25	96.3333	32.3333
CG13609	-1.33596	2.43426	3.6897e-10	1.51432e-08	115	122	134	41	63	45	123.667	49.6667
His2B:CG33872	-1.11552	3.16154	3.88699e-10	1.59054e-08	181	214	196	104	90	83	197	92.3333
beta4GalNAcTB	-0.908398	4.92306	4.19152e-10	1.71007e-08	619	690	618	345	336	357	642.333	346
CG6753	-1.75558	1.3206	4.30133e-10	1.74967e-08	53	63	64	26	15	13	60	18
Men-b	-0.738164	6.35282	4.54778e-10	1.83904e-08	1623	1685	1683	968	1095	969	1663.67	1010.67
Ir41a	-2.84427	0.0635022	5.30929e-10	2.13443e-08	30	21	29	1	8	2	26.6667	3.66667
CG17224	-1.56	1.86846	6.32581e-10	2.5283e-08	93	66	100	30	36	23	86.3333	29.6667
CG6018	-3.62904	-0.514136	7.25509e-10	2.87464e-08	18	15	20	2	1	1	17.6667	1.33333
Ac78C	-2.94032	1.17335	8.05039e-10	3.15341e-08	29	59	98	9	5	10	62	8
Corp	-1.5109	1.97516	1.0706e-09	4.16989e-08	89	77	111	26	38	34	92.3333	32.6667
Toll-9	-1.57589	1.91338	1.23012e-09	4.77767e-08	113	69	86	35	30	26	89.3333	30.3333
CG6574	-0.872457	4.61181	1.24263e-09	4.81265e-08	482	497	562	274	321	259	513.667	284.667
CG31869	-1.16658	6.31734	1.40147e-09	5.39743e-08	1950	1454	1999	1165	712	582	1801	819.667
CG16800	-3.94882	-0.577688	1.51174e-09	5.80585e-08	11	20	20	2	0	1	17	1
CG14683	-0.688239	6.93494	1.6223e-09	6.21308e-08	2311	2394	2680	1628	1719	1317	2461.67	1554.67
Spn42De	-0.967478	4.16074	1.89481e-09	7.23661e-08	336	410	404	200	214	183	383.333	199
CG17841	-0.91878	5.19847	2.01569e-09	7.67691e-08	802	883	652	473	439	350	779	420.667
obst-E	-2.85745	0.187225	2.08531e-09	7.92015e-08	18	41	29	3	4	5	29.3333	4
CG1942	-5.06551	-0.763074	2.13054e-09	8.06965e-08	16	21	8	0	0	1	15	0.333333
CG6788	-4.21063	-0.789287	2.26126e-09	8.42549e-08	14	15	14	0	1	1	14.3333	0.666667
CG33496	-2.20754	2.93903	2.25543e-09	8.42549e-08	284	226	96	58	40	36	202	44.6667
CG15599	-4.85957	-0.922145	2.43344e-09	8.99393e-08	11	14	14	1	0	0	13	0.333333
CG14696	-0.913188	5.21087	2.52048e-09	9.29063e-08	684	870	803	378	449	438	785.667	421.667
CG17119	-2.02666	0.634709	2.55685e-09	9.39949e-08	34	41	38	8	15	5	37.6667	9.33333
Rcd6	-0.881456	4.40811	2.95426e-09	1.0774e-07	409	436	495	248	258	231	446.667	245.667
Traf4	-0.950603	4.74045	2.99968e-09	1.09107e-07	631	572	512	367	286	251	571.667	301.333
CG9279	-1.47993	1.61213	3.0611e-09	1.11048e-07	83	65	64	26	29	22	70.6667	25.6667
CG31798	-1.63739	1.87255	3.57602e-09	1.28466e-07	92	78	93	37	16	32	87.6667	28.3333
Gpo-1	-1.26975	3.92611	3.57861e-09	1.28466e-07	315	443	282	138	164	137	346.667	146.333
qin	-1.32259	2.97773	3.6495e-09	1.30669e-07	220	129	195	74	79	67	181.333	73.3333
CG10026	-2.69314	0.835117	3.76669e-09	1.34515e-07	61	21	60	8	10	4	47.3333	7.33333
dream	-1.13378	2.80591	4.67243e-09	1.66428e-07	162	132	169	84	69	61	154.333	71.3333
Cpr76Bc	-6.48513	-1.13115	4.79974e-09	1.70433e-07	10	9	14	0	0	0	11	0
tnc	-1.71682	8.42516	4.80966e-09	1.70433e-07	10955	5501	9426	4403	2124	1558	8627.33	2695
Fim	-0.716161	7.28042	5.04812e-09	1.78423e-07	3253	2774	3436	2250	1923	1678	3154.33	1950.33
Myo61F	-0.70011	6.56917	5.12259e-09	1.80591e-07	2049	1775	1923	1364	1211	1023	1915.67	1199.33
otk	-0.848049	6.69354	5.50725e-09	1.93161e-07	2531	1797	2185	1511	1137	1030	2171	1226
CG10200	-0.736301	6.98444	6.49742e-09	2.26733e-07	2598	2324	2824	1855	1652	1235	2582	1580.67
CG8066	-1.5411	1.38569	7.878e-09	2.73522e-07	54	60	68	21	18	24	60.6667	21
CG30269	-2.21902	0.344596	8.79033e-09	3.04429e-07	32	34	27	11	3	6	31	6.66667
PGRP-LC	-1.72945	2.32841	9.82825e-09	3.39519e-07	173	75	122	38	44	31	123.333	37.6667
Peritrophin-A	-1.28836	2.17836	1.01751e-08	3.48754e-07	109	110	87	38	48	41	102	42.3333
Pax	-0.677271	6.85651	1.03093e-08	3.5172e-07	2330	2253	2388	1742	1479	1220	2323.67	1480.33
dpr18	-3.11885	-0.264798	1.04187e-08	3.54571e-07	14	19	30	3	1	3	21	2.33333
Tsp42El	-1.34938	2.58321	1.05404e-08	3.56978e-07	103	156	154	48	61	55	137.667	54.6667
CG42678	-0.616574	6.69183	1.05414e-08	3.56978e-07	2032	2078	2002	1356	1455	1237	2037.33	1349.33
mago	-0.677533	6.91579	1.09708e-08	3.70607e-07	2170	2467	2626	1498	1705	1406	2421	1536.33
NaCP60E	-0.810855	5.43175	1.5067e-08	5.07736e-07	993	814	877	588	462	498	894.667	516
CG32392	-2.12498	1.262	1.52744e-08	5.12214e-07	81	50	51	23	6	13	60.6667	14
gkt	-0.697809	5.63371	1.83269e-08	6.13083e-07	1014	1049	932	646	674	558	998.333	626
CG3520	-0.674633	5.95211	1.8634e-08	6.20336e-07	1322	1151	1246	793	828	740	1239.67	787
CG30273	-2.20485	0.333277	1.88158e-08	6.24874e-07	25	39	28	9	5	6	30.6667	6.66667
Slob	-3.96741	-0.556276	1.89912e-08	6.29181e-07	27	9	16	1	0	2	17.3333	1
CG3714	-0.683528	5.34357	2.06431e-08	6.80629e-07	782	848	810	546	537	461	813.333	514.667
CG13188	-1.36043	2.82099	2.133e-08	7.01595e-07	120	200	169	56	73	64	163	64.3333
CG13278	-1.2815	1.92238	2.31345e-08	7.59133e-07	78	81	96	31	39	36	85	35.3333
CG10098	-0.704515	6.12975	2.49898e-08	8.16116e-07	1501	1297	1444	1038	874	737	1414	883
CG14695	-6.52753	-1.09934	2.67269e-08	8.70779e-07	5	12	17	0	0	0	11.3333	0
CG44102	-2.69634	0.947365	2.76532e-08	8.98826e-07	88	31	35	8	12	4	51.3333	8
CG11261	-1.03052	3.31751	2.98051e-08	9.66488e-07	200	203	245	91	126	104	216	107
CG9737	-1.8069	1.28692	3.01092e-08	9.74051e-07	41	69	67	11	22	18	59	17
kek2	-1.77137	0.830821	3.11006e-08	1.00376e-06	47	35	44	11	10	16	42	12.3333
CG42343	-6.34953	-1.23067	3.11749e-08	1.0038e-06	13	7	10	0	0	0	10	0
CG4210	-0.893159	4.83133	3.2461e-08	1.04277e-06	512	614	678	288	374	321	601.333	327.667
Gbeta5	-1.49547	1.18602	3.58143e-08	1.14514e-06	50	56	50	22	18	16	52	18.6667
pain	-0.950867	6.68829	3.8533e-08	1.22921e-06	2555	1823	2276	1584	1108	829	2218	1173.67
CG5367	-1.47849	1.39383	3.8939e-08	1.23929e-06	55	63	63	30	22	14	60.3333	22
uzip	-0.668739	6.72166	4.14149e-08	1.309e-06	1869	2070	2398	1322	1382	1325	2112.33	1343
CG5830	-0.602817	7.99275	4.16269e-08	1.31268e-06	4983	4733	5315	3468	3480	3086	5010.33	3344.67
CG3603	-0.831067	4.36299	4.65774e-08	1.46208e-06	422	463	395	255	252	224	426.667	243.667
CG15117	-2.93586	0.356871	4.73884e-08	1.48415e-06	15	43	43	1	6	6	33.6667	4.33333
CG5527	-2.42256	-0.0525401	5.09737e-08	1.59281e-06	25	26	19	5	6	2	23.3333	4.33333
GstD2	-2.01586	0.485719	5.5049e-08	1.71626e-06	36	23	42	8	9	8	33.6667	8.33333
Obp73a	-1.48868	1.24706	5.59555e-08	1.73664e-06	58	53	52	22	25	12	54.3333	19.6667
CG13359	-2.87618	-0.451671	5.97752e-08	1.84685e-06	15	21	17	2	2	3	17.6667	2.33333
CG10383	-0.890265	4.2493	6.41632e-08	1.97798e-06	398	380	424	195	227	232	400.667	218
vib	-0.643686	7.29595	6.74714e-08	2.07531e-06	3038	2795	3551	2234	2072	1789	3128	2031.67
CG6785	-1.14023	2.18806	7.10018e-08	2.17417e-06	106	99	94	53	50	35	99.6667	46
GstE8	-1.3613	2.24846	7.16394e-08	2.18882e-06	79	110	138	50	42	37	109	43
CG5535	-1.12109	5.49856	7.53263e-08	2.29129e-06	717	1129	1176	354	570	480	1007.33	468
krimp	-0.907171	4.74116	7.60162e-08	2.30246e-06	477	516	710	292	341	286	567.667	306.333
nxf2	-0.630863	6.33728	7.60287e-08	2.30246e-06	1560	1469	1777	1074	1096	974	1602	1048
GstD4	-2.12336	0.21084	8.08155e-08	2.43136e-06	23	25	35	6	6	7	27.6667	6.33333
CG8317	-1.0836	2.54024	8.39222e-08	2.51931e-06	143	123	113	67	67	48	126.333	60.6667
CG5568	-2.66044	-0.31821	8.61003e-08	2.57346e-06	16	22	20	1	5	3	19.3333	3
Nnf1b	-0.966313	3.36869	1.00306e-07	2.99156e-06	183	236	242	112	123	108	220.333	114.333
CG11897	-0.874836	4.12742	1.08566e-07	3.22392e-06	370	346	384	246	185	178	366.667	203
CG43265	-2.58901	-0.246385	1.14536e-07	3.39386e-06	17	27	17	4	3	3	20.3333	3.33333
Cyp9c1	-0.694975	5.92625	1.15877e-07	3.42622e-06	1089	1364	1213	780	823	699	1222	767.333
Pxd	-1.65894	0.813611	1.19269e-07	3.51894e-06	36	47	39	14	13	12	40.6667	13
Pvr	-0.689418	6.69846	1.19827e-07	3.52784e-06	2249	1822	2203	1600	1229	1124	2091.33	1317.67
amd	-0.982872	3.53404	1.23325e-07	3.62306e-06	301	230	214	131	139	113	248.333	127.667
beat-IIb	-2.09604	1.61527	1.24849e-07	3.65223e-06	115	59	60	31	17	8	78	18.6667
CG6602	-1.65605	0.847284	1.28754e-07	3.75848e-06	42	47	36	11	15	14	41.6667	13.3333
CG7231	-1.06477	3.4793	1.35474e-07	3.93792e-06	267	200	265	154	110	92	244	118.667
CG30427	-3.29616	-0.763967	1.37361e-07	3.96761e-06	13	16	13	0	2	2	14	1.33333
CG5379	-2.29263	-0.0514481	1.37203e-07	3.96761e-06	24	26	19	5	4	5	23	4.66667
Aprt	-0.828108	3.8492	1.44545e-07	4.16636e-06	283	296	316	178	173	160	298.333	170.333
CG31248	-2.06148	0.284356	1.50237e-07	4.32136e-06	27	34	26	13	5	3	29	7
CG15611	-0.704424	5.86916	1.64356e-07	4.70776e-06	1087	1218	1231	658	805	732	1178.67	731.667
CG4115	-0.834456	4.02444	1.83111e-07	5.2124e-06	322	365	325	204	211	163	337.333	192.667
CG9170	-0.627048	6.14638	1.83777e-07	5.22056e-06	1505	1342	1353	971	1025	774	1400	923.333
rgr	-0.9968	3.20018	1.90116e-07	5.38949e-06	193	214	184	86	124	91	197	100.333
ZnT63C	-0.661108	5.85783	2.09943e-07	5.91497e-06	1271	1037	1164	835	751	645	1157.33	743.667
CG13650	-1.51776	1.36106	2.25838e-07	6.33684e-06	79	51	48	22	24	17	59.3333	21
CG42806	-0.612436	6.67932	2.27811e-07	6.37918e-06	1811	2045	2201	1292	1526	1206	2019	1341.33
CG8026	-0.607794	6.11564	2.31506e-07	6.46946e-06	1329	1357	1404	963	1011	760	1363.33	911.333
CG4666	-2.40009	-0.163647	2.36672e-07	6.58705e-06	26	15	23	4	5	3	21.3333	4
CG30424	-1.84453	0.505994	2.37523e-07	6.59739e-06	29	28	43	10	11	7	33.3333	9.33333
bmm	-1.70931	1.28432	2.628e-07	7.2701e-06	77	48	49	28	14	12	58	18
CG17104	-0.776841	5.13607	2.69185e-07	7.43178e-06	598	815	750	415	453	412	721	426.667
CG8642	-2.55795	-0.393142	3.25858e-07	8.97841e-06	15	21	18	3	3	3	18	3
Rep	-0.608174	5.72199	3.36568e-07	9.25494e-06	1049	949	1117	714	735	624	1038.33	691
Parp	-0.643984	7.52116	3.53343e-07	9.67752e-06	3333	3437	4197	2255	2469	2361	3655.67	2361.67
His1:CG33810	-1.15898	1.9969	3.57363e-07	9.74877e-06	72	93	97	41	43	35	87.3333	39.6667
CG3008	-0.569502	6.49492	3.5817e-07	9.75145e-06	1722	1689	1857	1253	1281	1071	1756	1201.67
chinmo	-1.56679	4.46454	3.83731e-07	1.04062e-05	370	616	621	109	172	257	535.667	179.333
CG9436	-0.855437	5.10601	3.88347e-07	1.05106e-05	743	854	559	415	433	366	718.667	404.667
CG10205	-2.7748	-0.375359	4.95371e-07	1.31738e-05	27	12	17	5	2	1	18.6667	2.66667
CG9689	-0.844794	6.6897	5.00392e-07	1.32816e-05	2039	2052	2396	1691	1158	851	2162.33	1233.33
CG33056	-0.688621	4.7811	5.51199e-07	1.4546e-05	521	556	576	355	343	340	551	346
CG31769	-3.87242	-1.03783	5.78368e-07	1.52337e-05	7	11	16	1	0	1	11.3333	0.666667
CG31323	-1.54628	0.839013	6.12684e-07	1.60453e-05	36	41	45	11	14	17	40.6667	14
CG3726	-0.906771	3.87897	6.37699e-07	1.66371e-05	366	297	268	191	168	146	310.333	168.333
CG32625	-2.49748	0.49982	7.02745e-07	1.82647e-05	18	52	38	2	8	9	36	6.33333
piwi	-1.01061	3.55347	7.46143e-07	1.92833e-05	216	249	296	105	133	142	253.667	126.667
CG34417	-0.597289	8.86029	7.45279e-07	1.92833e-05	10156	8117	9120	7051	5791	5524	9131	6122
CG12950	-2.64661	-0.473242	7.64499e-07	1.97206e-05	15	21	15	3	5	0	17	2.66667
CG11966	-2.72915	-0.554712	7.99056e-07	2.04967e-05	15	19	14	1	1	5	16	2.33333
CG32138	-0.591273	6.92812	8.00878e-07	2.05052e-05	2573	2353	2225	1825	1558	1440	2383.67	1607.67
rpr	-0.903033	4.94999	8.46055e-07	2.16216e-05	505	713	745	312	358	387	654.333	352.333
CG18522	-1.73465	1.08533	9.55821e-07	2.43363e-05	30	60	61	21	14	11	50.3333	15.3333
egr	-0.911732	3.96673	9.85237e-07	2.50389e-05	340	289	364	228	175	135	331	179.333
yellow-h	-1.62457	1.17858	1.0186e-06	2.58389e-05	35	51	73	15	21	16	53	17.3333
path	-1.148	8.24548	1.15106e-06	2.90919e-05	4541	5423	10602	3772	3036	2596	6855.33	3134.67
CG15545	-1.26154	1.87369	1.1767e-06	2.96455e-05	103	77	65	42	36	26	81.6667	34.6667
CG13722	-2.23028	-0.0993567	1.22883e-06	3.08305e-05	29	17	20	8	3	3	22	4.66667
Cct1	-0.603578	5.85335	1.24042e-06	3.10648e-05	1237	1091	1076	816	758	699	1134.67	757.667
babos	-0.60772	7.21183	1.24541e-06	3.10915e-05	2926	2797	3032	2240	2152	1481	2918.33	1957.67
CG18278	-1.72602	1.49978	1.28506e-06	3.19584e-05	98	48	58	29	24	10	68	21
Sulf1	-0.606361	7.61912	1.2854e-06	3.19584e-05	4182	3316	4124	2960	2599	2199	3874	2586
viaf	-0.604769	6.3218	1.40924e-06	3.49112e-05	1613	1680	1415	1121	1146	890	1569.33	1052.33
CG5335	-0.988108	3.05569	1.45513e-06	3.5854e-05	154	198	181	88	82	101	177.667	90.3333
CG4404	-1.27883	1.75049	1.49282e-06	3.67018e-05	77	82	66	21	43	30	75	31.3333
CG6405	-2.02554	-0.0841032	1.57385e-06	3.83669e-05	20	24	21	5	9	2	21.6667	5.33333
yellow-c	-0.716699	5.25036	1.62534e-06	3.95519e-05	652	858	796	441	550	435	768.667	475.333
CG6739	-0.676114	4.66077	1.65789e-06	4.0131e-05	480	538	496	353	322	288	504.667	321
na	-2.66909	-0.599228	1.69297e-06	4.08363e-05	19	14	13	3	0	4	15.3333	2.33333
CG10559	-1.20385	2.45702	1.72053e-06	4.14284e-05	95	158	113	52	65	45	122	54
CG13060	-1.5752	1.67558	1.85836e-06	4.45909e-05	84	97	44	24	32	21	75	25.6667
Cyp311a1	-4.07269	-0.893941	2.16089e-06	5.14905e-05	4	20	15	0	1	1	13	0.666667
rtet	-0.596279	5.88262	2.20271e-06	5.23963e-05	1235	1063	1172	891	795	650	1156.67	778.667
CG6414	-1.63717	0.498221	2.21495e-06	5.25464e-05	35	32	29	13	6	12	32	10.3333
CG6118	-1.46675	0.837662	2.21666e-06	5.25464e-05	37	48	35	18	15	11	40	14.6667
Ance-2	-3.00127	-0.73916	2.38832e-06	5.64211e-05	8	20	14	1	2	2	14	1.66667
CG13024	-0.881223	3.05385	2.44694e-06	5.75093e-05	193	171	155	94	93	98	173	95
CG9691	-0.852106	6.02442	2.48024e-06	5.81925e-05	1425	1507	1150	1017	787	522	1360.67	775.333
pst	-0.839041	3.08784	2.63135e-06	6.15279e-05	179	153	195	107	95	96	175.667	99.3333
CG13739	-1.55823	0.744622	2.70698e-06	6.31889e-05	28	40	46	10	16	13	38	13
SP1173	-0.936784	8.00187	2.88624e-06	6.71455e-05	4231	6155	6069	2118	3100	3401	5485	2873
PICK1	-0.924275	2.42145	2.94128e-06	6.83103e-05	110	106	120	62	56	61	112	59.6667
CG15628	-0.781842	5.88615	2.95001e-06	6.83974e-05	1459	933	1268	879	737	554	1220	723.333
CG31051	-1.33453	1.71872	2.96067e-06	6.85291e-05	86	51	86	36	36	18	74.3333	30
Gdh	-0.588045	8.98828	3.12067e-06	7.17493e-05	9095	11440	9231	6891	6692	6501	9922	6694.67
Cpr51A	-0.675328	5.18574	3.13988e-06	7.20704e-05	721	827	630	484	478	425	726	462.333
CG17036	-1.06203	2.01134	3.15055e-06	7.21948e-05	89	89	81	54	37	35	86.3333	42
Lsp1alpha	-1.91055	0.644831	3.1807e-06	7.27646e-05	48	32	32	3	18	9	37.3333	10
CG43394	-0.619164	4.95527	3.27559e-06	7.48109e-05	619	608	604	428	387	392	610.333	402.333
CG9514	-2.85289	-0.646191	3.28468e-06	7.48939e-05	22	8	15	2	3	1	15	2
CG43107	-2.53199	-0.177905	3.47377e-06	7.90744e-05	16	34	14	2	6	3	21.3333	3.66667
CG8213	-1.51964	0.790365	3.60927e-06	8.18876e-05	41	44	32	13	10	18	39	13.6667
Tsf3	-0.922006	3.65899	3.61546e-06	8.18929e-05	263	284	254	122	135	168	267	141.667
CG31055	-0.853742	4.48615	3.65402e-06	8.26301e-05	488	352	569	304	250	235	469.667	263
CG5217	-1.72446	0.645127	3.80278e-06	8.57121e-05	48	23	38	12	8	13	36.3333	11
lbm	-1.28021	1.2252	3.90833e-06	8.78032e-05	60	49	45	22	19	23	51.3333	21.3333
CG16718	-0.588581	5.62134	4.05238e-06	9.0891e-05	1024	836	1030	707	643	597	963.333	649
ple	-1.79909	0.555005	4.08549e-06	9.14843e-05	34	27	42	18	9	3	34.3333	10
CG6115	-0.521856	6.94376	4.31538e-06	9.63184e-05	2221	2279	2599	1821	1765	1441	2366.33	1675.67
CG8086	-1.64946	1.39485	4.32793e-06	9.64419e-05	52	86	48	23	29	9	62	20.3333
Nc73EF	-0.542856	7.44177	4.46341e-06	9.93001e-05	3642	3342	3089	2546	2325	2149	3357.67	2340
CG42662	-1.25864	2.50103	4.84161e-06	0.000107021	111	136	136	36	52	72	127.667	53.3333
CG4872	-0.60586	4.84492	4.98586e-06	0.000110033	595	546	549	406	395	328	563.333	376.333
mGluRA	-2.10398	-0.0986856	5.0477e-06	0.000111041	30	14	21	4	5	6	21.6667	5
CG32066	-0.555481	5.49766	5.18325e-06	0.000113659	897	851	876	606	652	554	874.667	604
Cpr11A	-2.75676	0.879316	5.32301e-06	0.000116538	17	70	60	2	15	5	49	7.33333
alphaPS4	-1.902	0.785788	5.45399e-06	0.000119216	37	49	38	21	11	2	41.3333	11.3333
Ect4	-0.518424	6.73063	5.54476e-06	0.000121008	2182	1870	2064	1560	1388	1374	2038.67	1440.67
CG13041	-1.55542	2.98653	5.63648e-06	0.00012262	250	228	90	74	72	52	189.333	66
CG6232	-1.32796	1.18485	5.63579e-06	0.00012262	64	45	42	19	26	16	50.3333	20.3333
Dgp-1	-0.882703	6.28155	5.73108e-06	0.000124481	1041	1875	2011	952	961	803	1642.33	905.333
CAH2	-1.26091	2.47031	6.32733e-06	0.000136784	147	101	127	81	47	32	125	53.3333
cp309	-0.503608	7.10507	6.38163e-06	0.000137741	2613	2441	2846	2038	1926	1690	2633.33	1884.67
RhoL	-0.706192	4.26538	6.51732e-06	0.00014023	363	383	414	229	286	208	386.667	241
Zw	-0.611513	5.34399	6.54335e-06	0.00014057	799	836	758	617	541	439	797.667	532.333
CG42575	-0.807559	6.31433	7.14593e-06	0.000153275	1269	1742	1939	783	991	1067	1650	947
CG15528	-1.53922	0.58926	7.34968e-06	0.000157205	29	42	30	13	9	13	33.6667	11.6667
Ude	-1.57609	3.36255	7.69055e-06	0.000163934	139	322	284	56	79	114	248.333	83
Porin2	-2.3276	-0.556293	7.91267e-06	0.000168147	12	17	17	3	3	3	15.3333	3
tor	-1.92548	0.558654	8.32602e-06	0.000176386	3202	2557	2887	3395	2853	2607	2882	2951.67
Buffy	-1.31392	1.13335	9.36715e-06	0.000197227	34	55	56	21	20	18	48.3333	19.6667
CG32582	-1.20015	1.18431	1.08051e-05	0.000225775	53	50	44	25	25	15	49	21.6667
tow	-1.42647	0.812994	1.14617e-05	0.000238767	28	46	43	17	14	13	39	14.6667
CG34349	-0.551239	6.49631	1.15042e-05	0.000239291	1692	1605	1953	1174	1213	1227	1750	1204.67
mnd	-0.83243	6.58432	1.23276e-05	0.000254874	1550	1675	2804	1383	1129	927	2009.67	1146.33
CG32572	-0.865328	3.03128	1.29108e-05	0.000266134	145	182	182	89	91	102	169.667	94
CG30059	-1.49499	1.52048	1.33246e-05	0.000273842	98	46	55	31	27	14	66.3333	24
ImpL1	-1.9208	-0.229925	1.36167e-05	0.000279011	19	19	19	5	5	5	19	5
CG33054	-0.669303	4.62272	1.40166e-05	0.000286351	452	497	524	279	338	319	491	312
CG6752	-0.652769	4.86869	1.3996e-05	0.000286351	645	485	613	356	395	369	581	373.333
CG44006	-2.10936	0.399135	1.44104e-05	0.000292945	26	16	54	7	6	9	32	7.33333
CG2781	-1.33753	0.901995	1.44246e-05	0.000292945	36	37	50	12	19	18	41	16.3333
CG15529	-1.16058	1.80048	1.46823e-05	0.000297739	84	59	85	45	39	20	76	34.6667
CG10463	-0.548375	5.26888	1.5053e-05	0.000304807	724	741	769	586	542	428	744.667	518.667
cer	-0.611408	4.9663	1.57457e-05	0.000317896	563	597	683	377	450	394	614.333	407
RpII140	-0.4923	8.47051	1.62315e-05	0.000326268	6883	6057	7367	5012	5147	4471	6769	4876.67
CG10232	-1.58908	0.236156	1.67108e-05	0.000335356	26	23	29	7	9	10	26	8.66667
CG31808	-1.43898	0.55742	1.67324e-05	0.000335356	32	26	39	12	12	12	32.3333	12
Dhc36C	-1.80642	0.222525	1.69605e-05	0.000339431	31	23	26	15	3	5	26.6667	7.66667
CG14314	-0.756845	3.83505	1.73741e-05	0.00034624	332	274	264	187	199	139	290	175
CG1607	-0.462203	8.9559	1.73762e-05	0.00034624	9071	8740	10367	7534	6978	6234	9392.67	6915.33
CG32485	-1.06866	1.66113	1.74036e-05	0.000346285	74	59	69	28	31	38	67.3333	32.3333
CG6310	-0.646825	4.96501	1.75547e-05	0.000348785	511	677	669	437	423	347	619	402.333
onecut	-1.23303	1.12716	1.78773e-05	0.000354683	37	51	54	19	21	21	47.3333	20.3333
l(1)G0232	-0.477365	6.83152	1.82197e-05	0.000360955	2342	1988	2152	1646	1675	1407	2160.67	1576
CG11289	-1.83524	-0.214432	1.89474e-05	0.000373756	18	18	21	8	6	2	19	5.33333
CG10344	-1.14454	2.46644	2.05087e-05	0.000402245	106	125	134	40	51	74	121.667	55
Sgs1	-2.39621	-0.645571	2.09231e-05	0.000408624	18	13	12	0	6	2	14.3333	2.66667
GstE3	-1.12283	1.47775	2.08989e-05	0.000408624	51	63	65	21	32	30	59.6667	27.6667
Spn42Da	-0.490444	6.30224	2.11022e-05	0.000410375	1537	1527	1437	1158	1115	982	1500.33	1085
CG13775	-0.824293	3.00674	2.34682e-05	0.000455039	170	171	154	91	86	105	165	94
RhoGDI	-0.507577	8.68031	2.35694e-05	0.000455774	6868	7740	8969	5384	6098	5310	7859	5597.33
CG2650	-2.18429	-0.534558	2.56011e-05	0.000492293	16	19	11	3	4	3	15.3333	3.33333
His1:CG33834	-1.12381	1.47625	2.72513e-05	0.000523293	45	59	75	27	29	27	59.6667	27.6667
CG12105	-2.07199	-0.392213	2.79703e-05	0.00053635	16	21	14	1	5	6	17	4
CG10581	-0.85383	2.3606	2.82089e-05	0.000539422	112	108	96	60	57	60	105.333	59
CG33510	-2.53885	-0.868715	2.8998e-05	0.000552835	12	12	12	1	5	0	12	2
Cas	-0.463171	8.67041	2.9031e-05	0.000552835	7381	7023	8729	5758	5890	5334	7711	5660.67
CG14275	-0.953112	3.13714	2.95199e-05	0.000561368	175	224	160	76	120	97	186.333	97.6667
Ipk1	-0.525184	5.17754	3.22875e-05	0.000609782	729	685	668	537	513	422	694	490.667
CG10365	-1.34747	2.42997	3.30816e-05	0.000623921	65	131	175	49	58	41	123.667	49.3333
CG42324	-1.40885	2.56277	3.44458e-05	0.000646988	161	67	186	66	44	47	138	52.3333
ox	-0.627064	5.7857	3.46524e-05	0.000649981	1072	1257	932	838	726	593	1087	719
ey	-1.9605	-0.112998	3.53242e-05	0.000660779	29	16	18	5	2	9	21	5.33333
alpha-Man-I	-0.458496	6.65989	3.62081e-05	0.000675475	2011	1731	1983	1557	1418	1254	1908.33	1409.67
CG18213	-0.629682	5.48762	3.6572e-05	0.00068134	773	890	998	503	629	603	887	578.333
Rbp1	-0.503764	7.38915	3.70873e-05	0.000690005	2913	3442	3248	2180	2533	2159	3201	2290.67
CG42633	-2.26557	-0.600647	3.72525e-05	0.000692142	9	16	19	5	2	2	14.6667	3
GstD5	-2.49663	-0.894966	3.77562e-05	0.000699609	10	14	11	2	3	1	11.6667	2
CG3618	-0.602593	4.52942	3.85186e-05	0.000711818	422	447	487	289	348	270	452	302.333
CG2641	-0.667982	4.26562	3.90504e-05	0.000716829	376	356	417	230	241	258	383	243
cib	-0.523167	10.1423	3.96746e-05	0.000727315	20113	19527	25688	17869	15925	12486	21776	15426.7
CG5665	-1.04825	1.30209	4.06658e-05	0.000743503	48	52	55	25	30	21	51.6667	25.3333
CG17738	-1.34064	0.777604	4.08395e-05	0.000745687	32	45	35	21	16	8	37.3333	15
His2B:CG33888	-1.0543	1.34476	4.11245e-05	0.000749895	47	59	54	29	24	25	53.3333	26
rt	-0.626006	5.16833	4.24197e-05	0.000771466	813	619	698	569	429	404	710	467.333
Inos	-0.565097	7.02785	4.49437e-05	0.000815212	2896	2535	2172	2061	1733	1448	2534.33	1747.33
CG4860	-0.626118	5.11605	4.58789e-05	0.000829985	685	765	598	403	511	433	682.667	449
CG10625	-0.826776	8.18179	4.62887e-05	0.000836298	6697	4552	6971	4997	3077	2425	6073.33	3499.67
Snap24	-0.499354	5.48519	4.85874e-05	0.000873239	876	839	845	659	659	525	853.333	614.333
asparagine-synthetase	-0.89411	5.07665	4.91924e-05	0.000881807	456	687	1002	432	419	322	715	391
Gprk1	-0.500649	7.57614	5.41702e-05	0.000961013	3433	3387	4127	2500	2689	2619	3649	2602.67
mthl15	-1.17512	1.1137	5.59337e-05	0.000985939	56	37	46	22	17	23	46.3333	20.6667
form3	-0.5369	4.89799	5.67244e-05	0.000998596	573	566	581	420	389	391	573.333	400

## Sheet: downregulated in sas-4
Symbol	logFC	logCPM	PValue	FDR	sas4_rep1	sas4_rep2	sas4_rep3	yw_rep1	yw_rep2	yw_rep3	Avg sas4	Avg yw
Cyp4p1	7.68889	5.12211	9.41618e-217	4.31544e-213	8	4	4	1103	1344	990	5.33333	1145.67
CG6912	7.47564	4.99621	9.39223e-215	3.22834e-211	8	6	3	1011	1149	976	5.66667	1045.33
CG15236	8.28402	5.42201	2.19993e-208	6.04938e-205	6	6	1	1291	1399	1509	4.33333	1399.67
Syt4	7.13305	5.97275	4.81456e-208	1.10326e-204	19	14	10	1736	2274	2134	14.3333	2048
CG3984	6.77271	4.02992	2.02555e-140	2.14225e-137	3	5	6	533	564	496	4.66667	531
Sas-4	3.58469	5.09703	1.19754e-107	1.02906e-104	87	95	74	995	1150	977	85.3333	1040.67
Cyp4p2	8.14485	7.63651	3.5424e-89	2.11759e-86	47	17	4	6245	7423	6012	22.6667	6560
GstE1	4.287	3.87571	1.52859e-70	6.56767e-68	21	26	22	384	521	464	23	456.333
CG34215	7.2214	1.91092	1.95779e-56	6.40897e-54	2	0	0	112	119	126	0.666667	119
CG41520	2.94247	4.12794	7.10062e-56	2.21878e-53	63	72	60	496	505	517	65	506
unc-13-4A	6.74812	1.94994	2.19464e-55	6.42004e-53	0	2	1	143	108	116	1	122.333
CG32686	3.95544	2.68609	5.08152e-52	1.39732e-49	14	11	12	237	183	169	12.3333	196.333
Klp54D	8.02618	1.92793	9.6931e-52	2.61315e-49	1	0	0	158	117	90	0.333333	121.667
hig	5.80725	1.70225	3.42438e-49	8.71886e-47	3	1	1	94	118	93	1.66667	101.667
phr	1.82079	6.68997	2.37059e-46	5.61952e-44	659	821	743	2525	3003	2452	741	2660
CG32681	3.07376	3.04503	1.66288e-45	3.8105e-43	35	25	24	275	248	200	28	241
pinta	2.65697	3.87736	2.07028e-42	4.44754e-40	52	60	83	412	450	386	65	416
Ir76a	3.0953	4.30948	1.76663e-41	3.68021e-39	55	61	86	457	692	595	67.3333	581.333
CG2898	4.37724	1.63267	7.66144e-39	1.54907e-36	7	2	4	109	92	81	4.33333	94
CG7366	2.70135	3.07793	4.90532e-35	8.99243e-33	34	44	30	219	251	243	36	237.667
CG31436	2.76555	2.79574	9.1612e-35	1.65733e-32	24	38	23	197	214	179	28.3333	196.667
norpA	1.4667	7.01285	8.49567e-29	1.29786e-26	1270	992	1094	3155	3002	3199	1118.67	3118.67
Ac3	1.74348	5.86653	1.57689e-27	2.28217e-25	421	436	453	1249	1487	1670	436.667	1468.67
Gfr	1.88272	3.57599	5.17237e-26	7.11149e-24	72	81	93	312	359	254	82	308.333
CG13897	1.69365	4.38731	1.99649e-25	2.69116e-23	171	158	151	601	568	417	160	528.667
CG32373	1.28548	6.43279	2.0833e-24	2.5348e-22	765	828	862	1873	2208	1976	818.333	2019
sec31	1.18877	8.27459	2.1041e-24	2.53766e-22	3384	2885	2967	7704	7396	6298	3078.67	7132.67
CG1924	4.5673	0.796413	9.35196e-24	1.06265e-21	2	4	0	65	52	37	2	51.3333
CG7916	4.57747	1.00355	1.37395e-23	1.53581e-21	3	1	3	80	63	37	2.33333	60
CG15282	1.78712	3.54781	1.7311e-23	1.90758e-21	90	78	86	353	300	241	84.6667	298
CG32111	1.20943	6.05108	2.49664e-23	2.70286e-21	667	583	707	1543	1628	1415	652.333	1528.67
CG18853	1.2782	6.12907	5.95369e-23	6.24864e-21	600	711	683	1539	1842	1528	664.667	1636.33
magu	1.1249	7.97245	1.17235e-21	1.14317e-19	2466	2770	2476	5742	6091	5253	2570.67	5695.33
Trn	1.30863	6.87531	1.92862e-21	1.8543e-19	1310	894	1101	2992	2677	2613	1101.67	2760.67
CG15905	2.03542	7.29256	2.3767e-21	2.26925e-19	1213	717	1084	5882	3935	2831	1004.67	4216
CG13890	1.26315	5.14846	3.83887e-21	3.61511e-19	312	315	391	850	899	732	339.333	827
Jheh1	1.58137	3.73578	5.22433e-21	4.82076e-19	89	116	118	348	352	284	107.667	328
Cpr67Fa2	3.20871	1.24186	8.52592e-21	7.71203e-19	2	12	7	64	81	56	7	67
CG8997	4.64607	0.361247	7.52324e-20	6.54665e-18	4	0	0	46	35	30	1.33333	37
swi2	1.52053	4.36325	1.32532e-19	1.13179e-17	170	148	200	461	539	501	172.667	500.333
CG2233	2.84413	1.66205	2.48454e-19	2.0703e-17	22	8	6	99	88	78	12	88.3333
TwdlM	3.54869	1.17008	3.32964e-19	2.75778e-17	2	12	2	54	74	66	5.33333	64.6667
CG42238	1.15285	7.46557	6.82397e-19	5.58469e-17	1922	1542	1905	3650	4501	3916	1789.67	4022.33
CG13679	2.57626	1.32063	8.10965e-19	6.49e-17	15	10	8	70	74	58	11	67.3333
nrm	1.48641	4.14667	2.10829e-18	1.62848e-16	166	153	133	406	453	424	150.667	427.667
CG13654	3.77444	0.612532	2.49905e-18	1.91952e-16	3	6	0	54	37	39	3	43.3333
CG3987	2.32922	1.57474	3.54229e-18	2.70572e-16	18	13	15	91	84	62	15.3333	79
E(spl)mbeta-HLH	1.04276	6.7652	8.91901e-18	6.55762e-16	1179	1209	1082	2560	2781	1962	1156.67	2434.33
CG33306	4.45949	0.19547	3.21824e-17	2.31662e-15	1	1	2	40	25	32	1.33333	32.3333
CG34411	3.21994	2.30699	3.27317e-17	2.3439e-15	19	16	10	217	145	75	15	145.667
Cpr31A	1.99099	2.15715	1.03056e-16	7.26621e-15	37	22	26	132	109	103	28.3333	114.667
gt	3.72343	0.696777	1.15361e-16	8.09236e-15	0	2	8	35	56	47	3.33333	46
CG16710	2.42319	1.97436	1.42923e-16	9.97487e-15	15	26	17	88	141	90	19.3333	106.333
rumi	0.951048	6.22787	2.93098e-16	1.99496e-14	825	816	855	1608	1811	1481	832	1633.33
CG2064	1.32294	3.66908	3.54548e-16	2.40132e-14	108	110	134	296	310	286	117.333	297.333
CG18577	5.90756	-0.0295529	4.6264e-16	3.11806e-14	0	0	1	26	41	17	0.333333	28
Prosalpha1	0.889125	9.33556	7.46601e-16	4.95895e-14	6962	7254	7954	14674	15584	11578	7390	13945.3
CG10151	1.46583	3.01653	8.36954e-16	5.50587e-14	60	70	77	196	199	185	69	193.333
CG6401	1.29285	3.7879	1.4484e-15	9.30566e-14	130	123	135	367	331	270	129.333	322.667
CG17684	1.94696	2.05651	2.19327e-15	1.3707e-13	21	26	34	103	129	87	27	106.333
E(spl)m2-BFM	1.04678	5.57071	2.85851e-15	1.7624e-13	541	494	477	1123	1214	852	504	1063
Gbs-76A	1.31795	5.12297	2.87785e-15	1.76641e-13	417	288	267	890	840	733	324	821
E(spl)malpha-BFM	0.875732	6.86458	5.02492e-15	3.07056e-13	1411	1301	1305	2672	2709	2125	1339	2502
Cap-H2	1.01176	7.28837	5.17352e-15	3.14738e-13	1669	1539	1865	3120	3650	3542	1691	3437.33
ana2	1.08481	5.26289	7.56718e-15	4.58331e-13	403	405	391	767	1007	807	399.667	860.333
CG11127	1.02853	5.35459	9.78937e-15	5.87747e-13	413	456	443	926	1031	770	437.333	909
CG13023	3.20443	4.33132	1.22543e-14	7.29368e-13	83	24	85	973	523	323	64	606.333
CG6220	2.61072	2.92444	2.12212e-14	1.24688e-12	49	25	28	210	315	120	34	215
IntS12	1.43774	4.47664	2.24639e-14	1.31428e-12	201	231	150	496	612	497	194	535
Ptr	1.57255	3.1649	3.67772e-14	2.11569e-12	71	58	89	245	192	218	72.6667	218.333
Ance	0.911579	9.80017	3.70034e-14	2.11983e-12	9574	10302	10389	22099	21208	14914	10088.3	19407
Hsp67Bc	4.51064	1.13388	7.40847e-14	4.17455e-12	3	3	2	80	99	20	2.66667	66.3333
spz5	1.92052	1.83604	1.09427e-13	6.11592e-12	17	32	21	100	94	77	23.3333	90.3333
CG1139	3.6026	0.153171	2.76624e-13	1.51526e-11	4	1	2	42	28	21	2.33333	30.3333
Ada2a	0.860883	6.42564	6.34077e-13	3.41879e-11	937	963	1084	1777	2042	1679	994.667	1832.67
CG32248	3.72465	-0.151051	1.68293e-12	8.89945e-11	1	3	1	27	27	18	1.66667	24
MED7	0.893617	5.87039	2.17479e-12	1.1199e-10	650	694	653	1197	1450	1126	665.667	1257.67
CG31817	1.56991	2.56995	2.92898e-12	1.49705e-10	53	40	50	140	184	110	47.6667	144.667
CG31809	2.75405	0.651296	3.50333e-12	1.77086e-10	12	2	4	35	48	42	6	41.6667
CG8908	2.20094	1.27783	3.51823e-12	1.77187e-10	11	14	15	46	73	68	13.3333	62.3333
Fps85D	0.812903	7.99099	3.73399e-12	1.86686e-10	3164	2761	3107	5483	6138	4532	3010.67	5384.33
CG42562	2.14614	1.05418	3.72101e-12	1.86686e-10	11	7	17	50	56	52	11.6667	52.6667
CG1835	2.25846	1.02834	3.97265e-12	1.97899e-10	11	12	9	67	55	36	10.6667	52.6667
TfIIFbeta	0.840397	6.00452	4.34623e-12	2.15727e-10	723	759	764	1345	1543	1202	748.667	1363.33
sea	0.818946	6.84246	5.92379e-12	2.92972e-10	1189	1432	1435	2550	2625	2107	1352	2427.33
CG13678	3.04387	0.364854	7.02612e-12	3.42561e-10	3	7	2	24	43	36	4	34.3333
CG6701	0.774894	7.49235	1.09239e-11	5.25147e-10	2041	2117	2339	3820	3823	3608	2165.67	3750.33
CG7328	1.58968	1.88739	3.24738e-11	1.47842e-09	30	25	32	107	86	74	29	89
CG33307	3.14692	-0.0569823	4.80821e-11	2.17461e-09	3	0	5	26	29	20	2.66667	25
CG43117	2.70502	0.194987	4.96144e-11	2.23655e-09	3	3	7	29	31	28	4.33333	29.3333
CG7409	2.06304	1.35745	5.79782e-11	2.59655e-09	19	12	15	55	59	80	15.3333	64.6667
pgant8	2.30021	0.830874	7.54745e-11	3.32596e-09	7	8	12	62	41	34	9	45.6667
Gs2	1.6864	3.52059	8.57426e-11	3.75438e-09	70	108	85	216	288	346	87.6667	283.333
dnc	0.943395	4.30592	8.71772e-11	3.80508e-09	230	204	224	432	459	393	219.333	428
CG10089	1.2279	2.9787	1.30183e-10	5.55863e-09	69	73	85	212	166	162	75.6667	180
mthl10	0.754482	6.31505	1.45145e-10	6.17834e-09	996	926	973	1594	1745	1604	965	1647.67
CG14082	6.74745	-0.92257	1.53634e-10	6.49941e-09	0	0	0	13	11	16	0	13.3333
CG30392	1.0101	4.47208	1.76418e-10	7.44041e-09	201	255	260	477	544	444	238.667	488.333
CG5731	0.889494	5.67732	2.02609e-10	8.49288e-09	555	495	705	1225	1112	961	585	1099.33
tko	0.842558	4.95369	2.19356e-10	9.13917e-09	358	379	343	704	700	568	360	657.333
CG14257	1.49356	5.45979	2.49771e-10	1.03749e-08	468	253	407	1518	1047	691	376	1085.33
Adgf-D	3.8289	-0.336544	3.581e-10	1.47411e-08	2	0	2	14	21	27	1.33333	20.6667
CG3191	2.76928	0.331695	4.31418e-10	1.74973e-08	2	2	10	29	30	39	4.66667	32.6667
Ddr	1.25964	3.37404	5.04708e-10	2.03496e-08	124	86	85	283	223	212	98.3333	239.333
CG42361	1.28392	2.52221	5.7405e-10	2.30105e-08	60	48	52	125	131	138	53.3333	131.333
E(spl)mgamma-HLH	1.28327	3.32806	6.54051e-10	2.60654e-08	83	107	92	193	289	216	94	232.667
grass	1.1754	3.01292	6.64393e-10	2.6401e-08	77	91	70	179	211	158	79.3333	182.667
CG32850	0.833357	5.67807	7.60525e-10	3.00473e-08	552	549	698	1024	1237	989	599.667	1083.33
GstT3	0.953658	4.34268	7.75686e-10	3.05585e-08	237	206	229	409	509	403	224	440.333
CG2663	1.39292	2.75812	7.79109e-10	3.06056e-08	52	53	74	202	158	120	59.6667	160
CG14921	2.18663	0.47352	9.19165e-10	3.59023e-08	7	10	5	33	37	33	7.33333	34.3333
CG15766	1.61428	1.85871	1.28682e-09	4.96979e-08	22	36	26	73	106	83	28	87.3333
HPS4	0.775295	5.51328	2.16759e-09	8.16498e-08	553	480	613	978	974	899	548.667	950.333
CG32368	2.94045	-0.21646	2.16654e-09	8.16498e-08	3	3	2	20	27	18	2.66667	21.6667
CG34452	3.34176	-0.455689	2.20342e-09	8.27727e-08	1	2	2	22	18	15	1.66667	18.3333
CG42561	1.67247	1.18362	2.2518e-09	8.42549e-08	15	15	20	52	54	56	16.6667	54
Edem1	0.783811	5.91407	2.30131e-09	8.55153e-08	730	623	814	1427	1237	1120	722.333	1261.33
jigr1	0.696054	7.24163	2.36798e-09	8.77556e-08	1786	1766	2101	3021	3385	2874	1884.33	3093.33
Mipp1	1.79896	1.1328	2.61257e-09	9.57874e-08	10	18	17	50	50	59	15	53
dtr	1.50971	1.81359	2.78955e-09	1.02004e-07	40	24	22	81	89	79	28.6667	83
CG13045	1.63269	1.92192	3.20976e-09	1.16134e-07	37	23	27	116	100	61	29	92.3333
E(spl)m8-HLH	0.983968	4.84806	3.42046e-09	1.23433e-07	335	343	262	608	772	520	313.333	633.333
E(spl)m4-BFM	0.827204	5.48791	5.21795e-09	1.83482e-07	583	543	450	928	1066	851	525.333	948.333
dpr6	6.50081	-1.10253	5.73921e-09	2.00785e-07	0	0	0	14	13	7	0	11.3333
5-HT1A	6.4196	-1.1655	7.12909e-09	2.48147e-07	0	0	0	10	13	9	0	10.6667
CG14321	6.66338	-0.981342	9.86718e-09	3.4001e-07	0	0	0	6	21	11	0	12.6667
CG18598	1.23415	2.15467	1.00008e-08	3.43752e-07	45	44	37	98	116	88	42	100.667
CG8172	1.54188	1.59216	1.0197e-08	3.48754e-07	29	23	20	61	91	62	24	71.3333
E(spl)m7-HLH	0.729458	5.37498	1.51649e-08	5.09784e-07	532	465	527	888	956	727	508	857
CG7675	0.938879	7.39912	1.83891e-08	6.13668e-07	2140	1516	2013	4821	3586	2697	1889.67	3701.33
CG6904	0.607726	7.7568	1.97864e-08	6.53951e-07	2812	2724	2845	4472	4611	3888	2793.67	4323.67
CG18661	0.850053	4.14808	2.41722e-08	7.91296e-07	213	210	191	398	389	338	204.667	375
bond	1.3814	1.73762	3.49978e-08	1.12164e-06	20	30	37	76	78	76	29	76.6667
CG6583	0.663237	6.40062	4.09837e-08	1.2989e-06	1020	1038	1138	1608	1907	1614	1065.33	1709.67
CG30026	4.62775	-1.06922	4.10011e-08	1.2989e-06	0	1	0	9	13	12	0.333333	11.3333
Ir85a	1.49013	1.23282	4.52572e-08	1.42389e-06	16	18	23	62	50	51	19	54.3333
Orco	4.80438	-0.948786	5.56596e-08	1.73137e-06	0	1	0	11	8	19	0.333333	12.6667
MED11	0.692837	5.27509	5.74703e-08	1.77964e-06	449	493	501	793	898	683	481	791.333
nab	0.867009	6.9383	6.95323e-08	2.13393e-06	1517	1595	1121	2245	2921	2655	1411	2607
VhaSFD	0.594186	7.31148	7.32943e-08	2.23442e-06	2150	1937	2104	3416	3283	2796	2063.67	3165
Cpr66D	0.901014	4.44284	7.93564e-08	2.39283e-06	289	242	206	447	511	439	245.667	465.667
CG1638	1.6872	1.05402	7.93608e-08	2.39283e-06	15	16	14	37	65	46	15	49.3333
CG5039	0.844862	3.68359	8.5354e-08	2.55671e-06	148	150	147	274	265	270	148.333	269.667
CG32581	0.594349	6.99018	1.04e-07	3.09501e-06	1605	1611	1737	2707	2775	2133	1651	2538.33
toe	0.757136	5.2576	1.24688e-07	3.65223e-06	517	471	397	786	912	687	461.667	795
ltl	0.602482	6.98398	1.34969e-07	3.93155e-06	1753	1449	1717	2640	2591	2336	1639.67	2522.33
CG9812	1.28429	3.24771	1.36304e-07	3.95368e-06	116	85	65	271	238	156	88.6667	221.667
CG17032	0.577526	7.8096	1.54834e-07	4.44428e-06	2990	2882	2930	4781	4754	3833	2934	4456
CG11253	0.845309	3.50384	1.77822e-07	5.0829e-06	130	140	122	242	248	225	130.667	238.333
Sry-alpha	0.779356	3.72043	1.81332e-07	5.17249e-06	159	158	153	274	292	253	156.667	273
Cyp6a2	3.51905	-0.870245	1.95614e-07	5.53393e-06	0	3	0	17	12	10	1	13
CG10623	0.913886	3.53742	1.99192e-07	5.62358e-06	121	142	126	286	269	194	129.667	249.667
CG10359	0.633984	7.41978	2.13049e-07	5.99022e-06	2422	1888	2259	3818	3654	2899	2189.67	3457
CG12896	1.19228	2.57352	2.34508e-07	6.54006e-06	59	58	56	162	156	88	57.6667	135.333
Cyp4p3	6.4811	-1.10424	2.51782e-07	6.97933e-06	0	0	0	19	12	3	0	11.3333
E(spl)mdelta-HLH	0.73962	4.94029	3.4229e-07	9.39352e-06	390	326	406	651	746	512	374	636.333
Faa	1.13072	2.29703	3.54503e-07	9.68999e-06	54	38	55	96	123	107	49	108.667
CG6362	1.68274	0.787269	3.66145e-07	9.94887e-06	14	16	7	42	35	44	12.3333	40.3333
CG42540	2.85115	-0.451765	4.44498e-07	1.20067e-05	3	1	3	12	17	24	2.33333	17.6667
CG42259	0.88982	3.70095	4.5343e-07	1.2202e-05	155	160	126	268	275	284	147	275.667
CG8083	2.10229	0.077689	4.53505e-07	1.2202e-05	9	5	3	26	21	28	5.66667	25
al	0.740949	5.87899	4.55581e-07	1.2234e-05	866	685	598	1287	1321	1050	716.333	1219.33
CG3339	4.60696	-1.07294	4.58978e-07	1.23012e-05	0	0	1	14	16	4	0.333333	11.3333
Rhp	0.587657	6.91028	4.75185e-07	1.27107e-05	1719	1386	1597	2521	2617	2048	1567.33	2395.33
Tom70	0.549902	6.65016	4.88498e-07	1.30415e-05	1331	1314	1338	2005	2175	1748	1327.67	1976
CG16824	1.62481	0.671408	4.9056e-07	1.30711e-05	9	13	13	32	39	39	11.6667	36.6667
CG31810	1.82809	0.472535	5.40112e-07	1.43083e-05	11	3	13	30	37	31	9	32.6667
CG15353	1.57745	5.18823	5.42606e-07	1.43467e-05	186	476	224	610	1022	1041	295.333	891
Kebab	0.665031	4.70427	6.0814e-07	1.59872e-05	317	318	347	536	553	490	327.333	526.333
Cap-D3	0.611107	5.49628	6.10244e-07	1.60119e-05	585	558	600	905	936	856	581	899
Cyp310a1	0.98236	7.44568	6.26353e-07	1.63721e-05	1695	2176	1847	2663	4161	4511	1906	3778.33
CG10924	1.30468	2.63799	6.76255e-07	1.76095e-05	34	59	79	133	164	134	57.3333	143.667
CG8630	1.64266	1.94871	7.12453e-07	1.84821e-05	25	27	37	58	99	121	29.6667	92.6667
CG12038	1.65954	1.33846	7.93702e-07	2.04356e-05	21	18	17	85	66	32	18.6667	61
modSP	0.57524	6.93317	7.97857e-07	2.04967e-05	1735	1547	1514	2644	2609	2029	1598.67	2427.33
Ir40a	3.40745	-0.952746	9.04553e-07	2.30737e-05	0	1	2	9	17	10	1	12
Hn	1.36308	1.21347	1.02686e-06	2.60006e-05	24	13	23	60	49	48	20	52.3333
CG42598	1.06601	2.59338	1.17728e-06	2.96455e-05	59	52	76	165	121	112	62.3333	132.667
CG42326	2.61588	1.77971	1.19508e-06	3.00387e-05	2	24	19	53	135	94	15	94
nyo	0.614535	7.05035	1.3187e-06	3.2727e-05	1956	1417	1754	2888	2725	2352	1709	2655
CG13907	1.42885	0.984794	1.42642e-06	3.52732e-05	14	18	17	48	38	48	16.3333	44.6667
CG13847	2.51203	-0.536849	1.4386e-06	3.55104e-05	1	2	5	15	17	16	2.66667	16
CG7778	1.66993	0.629427	1.49487e-06	3.67018e-05	8	12	13	48	35	25	11	36
CG15456	0.989254	2.4528	1.5309e-06	3.74635e-05	54	65	56	140	114	100	58.3333	118
CG7985	0.673632	5.10181	1.56189e-06	3.81428e-05	484	422	383	722	781	592	429.667	698.333
Claspin	0.605895	6.19727	1.63012e-06	3.95981e-05	948	888	1008	1326	1602	1447	948	1458.33
tok	0.564865	8.75418	1.64521e-06	3.98941e-05	6532	5223	5282	9267	8602	7716	5679	8528.33
CG8129	1.13407	3.37017	1.68557e-06	4.07292e-05	107	92	114	167	314	216	104.333	232.333
dj-1beta	0.703195	6.06286	1.76687e-06	4.24698e-05	828	961	688	1410	1548	1161	825.667	1373
mura	0.731155	5.98068	1.93149e-06	4.62648e-05	910	708	700	1593	1169	1148	772.667	1303.33
CG5687	1.6697	2.22656	2.07075e-06	4.94284e-05	46	23	37	176	111	61	35.3333	116
arr	0.540737	8.53079	2.28568e-06	5.40891e-05	5489	4369	4891	7926	7173	6652	4916.33	7250.33
Cyp4d2	0.741739	4.56827	2.42466e-06	5.71813e-05	286	307	270	441	578	448	287.667	489
CG10927	0.888078	2.98372	2.43949e-06	5.74323e-05	80	92	95	156	202	145	89	167.667
CG16820	1.46213	2.79032	2.56442e-06	6.00652e-05	49	88	39	125	196	172	58.6667	164.333
CG34139	2.4114	-0.47272	2.82216e-06	6.57659e-05	4	4	1	14	16	20	3	16.6667
Alg10	0.542598	6.23091	2.96844e-06	6.85935e-05	974	955	1059	1446	1564	1398	996	1469.33
CG41284	1.07341	2.4799	2.97432e-06	6.8614e-05	57	44	71	153	113	102	57.3333	122.667
CG16863	0.983402	2.69282	3.1139e-06	7.17135e-05	87	67	54	148	151	120	69.3333	139.667
Tie	0.723043	5.29015	3.5905e-06	8.15964e-05	471	494	474	667	853	873	479.667	797.667
alphaPS5	0.782421	3.51064	3.85419e-06	8.67288e-05	142	142	121	227	246	233	135	235.333
alpha-Est3	0.731978	3.84143	4.17943e-06	9.34358e-05	180	179	163	313	310	259	174	294
CG32241	1.94503	0.0351081	4.74746e-06	0.000105109	4	5	9	17	27	27	6	23.6667
CG1368	1.27806	1.4832	5.06772e-06	0.000111304	35	26	15	66	66	56	25.3333	62.6667
shf	0.528375	7.28464	5.86128e-06	0.000127025	2216	2103	1917	3153	3340	2663	2078.67	3052
Hex-C	2.08274	-0.266576	5.86667e-06	0.000127025	8	2	3	20	18	19	4.33333	19
E(spl)m3-HLH	0.553896	5.97774	6.43016e-06	0.000138571	822	850	820	1179	1343	1186	830.667	1236
CG17018	0.941104	2.48177	7.35203e-06	0.000157205	63	50	70	141	123	94	61	119.333
CG16798	0.976807	2.38772	7.6229e-06	0.000162744	50	65	53	101	138	98	56	112.333
CG11134	0.622571	4.73923	8.18359e-06	0.000173636	337	364	322	550	591	463	341	534.667
CG12206	0.52794	6.01097	8.64575e-06	0.000182878	884	856	838	1246	1350	1175	859.333	1257
CG34054	3.1959	-1.10057	9.17137e-06	0.000193698	1	2	0	7	14	10	1	10.3333
CG9948	0.659526	4.52594	9.32957e-06	0.000196737	262	272	336	487	503	406	290	465.333
salr	0.510046	8.18394	9.45611e-06	0.000198795	4330	3644	3761	5938	5931	5100	3911.67	5656.33
ana	0.984975	6.17396	9.56739e-06	0.000200828	1062	568	741	2170	1601	1043	790.333	1604.67
CG33993	0.582273	4.92029	1.00131e-05	0.000209543	413	391	377	646	640	514	393.667	600
tun	0.501575	6.27918	1.1434e-05	0.000238553	1055	994	1093	1569	1518	1419	1047.33	1502
l(2)41Ab	0.838846	2.58331	1.16723e-05	0.000242421	64	61	81	129	132	113	68.6667	124.667
yellow-e	0.836692	3.55419	1.17621e-05	0.000243917	118	143	147	207	296	236	136	246.333
CG5590	0.534536	6.64006	1.18229e-05	0.00024481	1378	1402	1195	2127	2117	1631	1325	1958.33
GABA-B-R2	0.678655	4.19974	1.23461e-05	0.000254874	236	237	213	360	392	361	228.667	371
bnb	0.755934	8.91447	1.30174e-05	0.000267928	5640	7139	4710	8273	10785	10786	5829.67	9948
Tsp42Ea	0.681696	7.67749	1.34217e-05	0.000275426	2269	2828	2581	3333	4806	4306	2559.33	4148.33
CG10262	1.32095	0.991978	1.43451e-05	0.000292628	13	21	18	35	50	47	17.3333	44
Def	2.12806	-0.434204	1.44092e-05	0.000292945	5	3	3	12	21	17	3.66667	16.6667
CG8366	0.594047	5.10671	1.52559e-05	0.00030846	438	409	493	708	797	556	446.667	687
kn	0.677862	5.10621	1.59445e-05	0.000321438	522	332	440	725	754	621	431.333	700
Cyp4d14	0.71276	3.55804	1.61079e-05	0.000324257	138	144	150	219	262	236	144	239
Art9	1.33074	0.834555	1.71177e-05	0.00034208	21	13	12	46	36	36	15.3333	39.3333
CG31785	1.3087	1.44668	1.85148e-05	0.000365747	31	14	28	81	61	43	24.3333	61.6667
CG5987	0.678844	3.48725	1.97469e-05	0.00038897	127	144	146	234	238	206	139	226
CG8800	2.06684	-0.375474	1.99972e-05	0.000393336	1	4	7	19	14	19	4	17.3333
CG9444	1.01992	1.64596	2.03953e-05	0.000400594	34	29	34	78	62	60	32.3333	66.6667
kek1	0.513013	7.77579	2.08343e-05	0.00040805	3152	2494	3200	4477	4346	3956	2948.67	4259.67
CG8801	0.478911	9.5222	2.09831e-05	0.000409215	9763	10708	9542	13831	14887	13679	10004.3	14132.3
in	0.552643	5.99609	2.10892e-05	0.000410375	885	805	837	1475	1169	1120	842.333	1254.67
mthl3	0.49136	8.40929	2.12878e-05	0.000413398	4322	4687	4811	6422	6931	6321	4606.67	6558
CG41378	0.529798	5.30023	2.34982e-05	0.000455039	515	487	572	747	824	730	524.667	767
Hsp67Bb	1.98546	0.139865	2.46737e-05	0.000475791	2	5	12	38	24	16	6.33333	26
CG32486	0.482552	6.15908	2.53991e-05	0.000489092	961	993	956	1437	1434	1258	970	1376.33
CG31547	1.20084	2.9332	2.80437e-05	0.000537009	114	50	59	149	202	168	74.3333	173
Dll	0.657485	5.69177	2.89012e-05	0.000551892	806	631	518	1139	1082	918	651.667	1046.33
sro	1.26132	0.873069	2.98926e-05	0.000567671	21	12	16	48	40	32	16.3333	40
Sod3	0.464359	7.49703	2.99497e-05	0.000567969	2540	2298	2590	3768	3658	2994	2476	3473.33
Nrt	0.751389	6.62079	3.15504e-05	0.000597503	1468	914	1209	2697	1885	1581	1197	2054.33
CHES-1-like	0.615037	6.64176	3.17974e-05	0.000601352	1250	1532	1060	1924	2089	1959	1280.67	1990.67
BoYb	1.63199	0.340386	3.38202e-05	0.000636978	7	12	8	20	41	25	9	28.6667
CG3328	0.68872	7.03584	3.42721e-05	0.000644607	2051	1643	1207	2991	2665	2386	1633.67	2680.67
Sb	0.94986	5.82224	3.47709e-05	0.000651315	897	456	533	1636	1229	866	628.667	1243.67
CG13083	1.79686	-0.133222	3.58929e-05	0.000670505	7	6	4	27	17	17	5.66667	20.3333
CG12182	0.56749	5.14475	3.76742e-05	0.000699032	426	441	524	697	814	587	463.667	699.333
CG6287	0.809254	7.23327	3.80958e-05	0.000704951	2155	1359	1842	4358	3164	2101	1785.33	3207.67
foxo	0.550509	5.55703	3.86128e-05	0.000712601	668	528	671	994	888	883	622.333	921.667
yellow-e2	0.511408	5.55028	3.87177e-05	0.000713074	624	582	681	882	997	847	629	908.667
CG5986	0.591797	4.70216	3.87422e-05	0.000713074	305	367	338	514	539	491	336.667	514.667
CG13676	0.498039	8.41247	3.89893e-05	0.000716663	5081	4463	4265	7398	6622	5813	4603	6611
CG18336	1.29986	1.30912	4.06309e-05	0.000743503	18	32	16	51	74	42	22	55.6667
brk	0.4552	6.76348	4.16201e-05	0.000757927	1579	1398	1503	2125	2091	2000	1493.33	2072
CG1698	0.661192	3.99258	4.41025e-05	0.00080101	210	204	184	361	336	267	199.333	321.333
CG15828	1.50034	0.384995	4.52459e-05	0.000819612	8	9	13	40	24	23	10	29
Sc2	0.468945	7.39779	4.83324e-05	0.000869793	2248	2332	2334	3396	3684	2680	2304.67	3253.33
CG32809	0.498063	5.25755	4.87904e-05	0.000875742	527	513	506	766	752	696	515.333	738
CG5245	0.940972	1.89063	5.07091e-05	0.00090663	48	34	38	72	89	73	40	78
CG1927	0.471225	7.34157	5.16359e-05	0.000922002	2035	2138	2478	3232	3413	2725	2217	3123.33
CG9747	0.590785	5.08727	5.23963e-05	0.000934367	481	401	441	765	758	513	441	678.667
CG30403	0.650718	4.73086	5.25691e-05	0.000936233	285	356	365	481	570	545	335.333	532
CG14693	1.1987	0.908588	5.34197e-05	0.000950152	17	14	21	40	37	44	17.3333	40.3333
CG4984	0.762762	3.14173	5.36166e-05	0.000952423	102	123	90	175	195	173	105	181
BI-1	0.455654	7.11026	5.49332e-05	0.000973294	1893	1821	1984	2539	2940	2446	1899.33	2641.67
CG31475	0.623983	5.18098	5.52595e-05	0.000977816	560	440	391	710	744	716	463.667	723.333
sprt	0.612318	4.06769	5.55187e-05	0.000981139	208	212	224	325	357	316	214.667	332.667
Sesn	1.18631	1.82614	5.57331e-05	0.000983663	43	31	28	55	106	75	34	78.6667
